# Supplementary material for: Elevated 4-hydroxynonenal induces hyperglycaemia via Aldh3a1 loss in zebrafish and associates with diabetes progression in humans
Source: PubMed Central journal article supplement — Redox Biol. 2020 Sep 16;37:101723. doi: 10.1016/j.redox.2020.101723 (PMC7519378; doi:10.1016/j.redox.2020.101723), 2020-09-16
Supplement: mmc1.pdf [file mmc1.pdf]

## Supplementary Appendix

This appendix has been provided by the authors to give readers additional information about their work.

Supplement to:

### **Elevated 4-hydroxynonenal induces hyperglycaemia via Aldh3a1 loss in zebrafish and associates with diabetes progression in humans**

Bowen Lou<sup>1,2</sup>, Mike Boger<sup>1</sup>, Katrin Bennewitz<sup>1</sup>, Carsten Sticht<sup>3</sup>, Stefan Kopf<sup>4,5</sup>, Jakob Morgenstern<sup>4,5</sup>, Thomas Fleming<sup>4,5</sup>, Rüdiger Hell<sup>6</sup>, Zuyi Yuan<sup>2</sup>, Peter Paul Nawroth<sup>4,5,7</sup> and Jens Kroll<sup>1\*</sup>

<sup>1</sup>Department of Vascular Biology and Tumor Angiogenesis, European Center for Angioscience (ECAS), Medical Faculty Mannheim, Heidelberg University, Mannheim, Germany.

<sup>2</sup>Cardiovascular Department, the First Affiliated Hospital of Xi'an Jiaotong University, Xi'an, 710048, People's Republic of China.

<sup>3</sup>Center for Medical Research (ZMF), Medical Faculty Mannheim, Heidelberg University, Mannheim, Germany.

<sup>4</sup>Department of Internal Medicine I and Clinical Chemistry, Heidelberg University Hospital, Heidelberg, Germany.

<sup>5</sup>German Center for Diabetes Research (DZD), Neuherberg, Germany.

<sup>6</sup>Metabolomics Core Technology Platform, Centre for Organismal Studies, Heidelberg University, Heidelberg, Germany.

<sup>7</sup>Joint Heidelberg-IDC Translational Diabetes Program, Helmholtz-Zentrum, München, Heidelberg, Germany.

\*Correspondence: Prof. Dr. Jens Kroll, Email: [jens.kroll@medma.uni-heidelberg.de](mailto:jens.kroll@medma.uni-heidelberg.de).

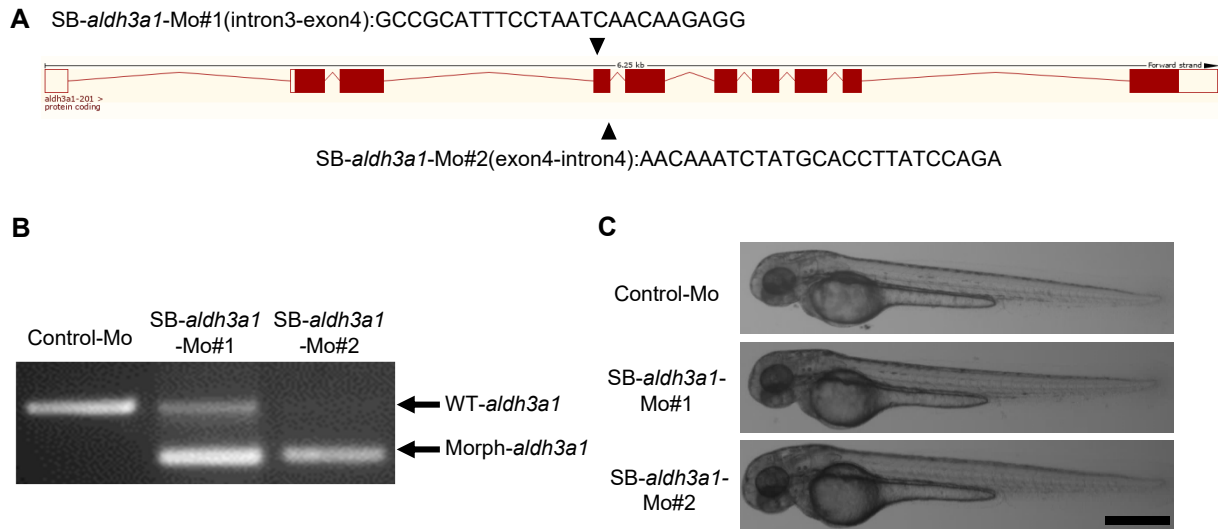

**Figure S1. *Aldh3a1* morpholino design and validation.**

(A). SB-*aldh3a1*-Mo#1 and SB-*aldh3a1*-Mo#2 target intron3-exon4 and exon4-intron4 junctions of *aldh3a1-201*, respectively. (B). Validation of splice-blocking morpholinos: SB-*aldh3a1*-Mo#1 and SB-*aldh3a1*-Mo#2. RT-PCR of Control-Mo, SB-*aldh3a1*-Mo#1 and SB-*aldh3a1*-Mo#2 injected larvae at 48 hpf show wild type and generation of morphant *aldh3a1* signals. 6 ng of morpholinos: Control-Mo, SB-*aldh3a1*-Mo#1 and SB-*aldh3a1*-Mo#2 were injected into the one-cell stage of zebrafish embryos, respectively. (C) Microscopic images showed normal gross morphology of zebrafish larvae at 48 hpf after morpholino injection. Black scale bar =500  $\mu$ m. WT, wild type; Mo, morpholino; Morph: morphant.

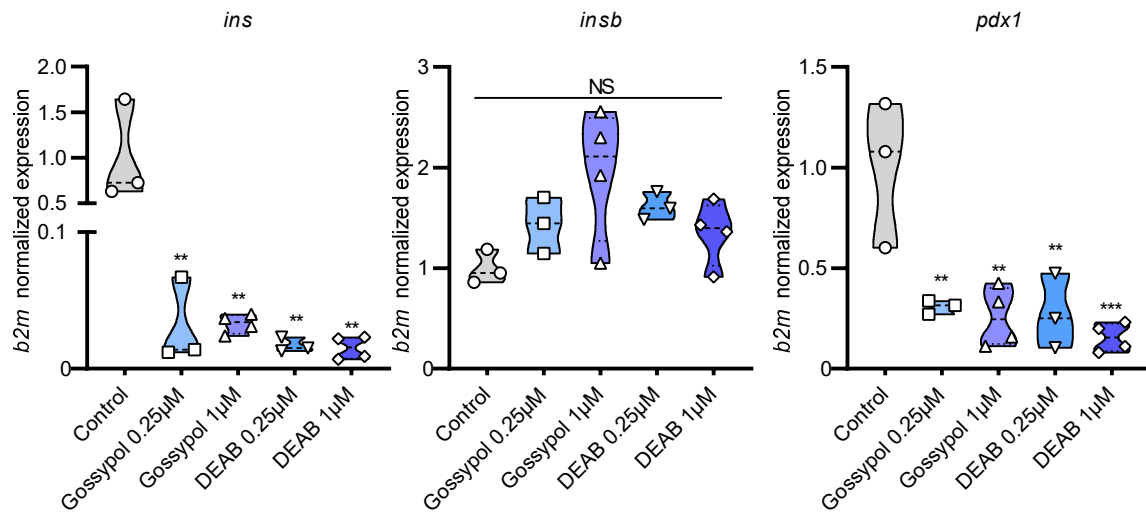

**Figure S2. *ins* and *pdx1* mRNA expression were decreased significantly while *insb* was unaltered in wild type zebrafish larvae at 48 hpf after ALDH inhibitor treatment.**

Expression of mRNA was analysed by RT-qPCR and was normalized to *b2m*. The average values of control group were standardized to 1, n = 3-4 clutches with 30 larvae per group. ALDH inhibitors, 0.25 µM and 1 µM Gossypol and DEAB treatment were started at 3 hpf and continued until end; Medium was changed every day. For statistical analysis one-way ANOVA followed by Sidak's multiple comparison test was applied, \*\*p<0.01 \*\*\*p<0.001. DEAB, N,N-diethylaminobenzaldehyde.

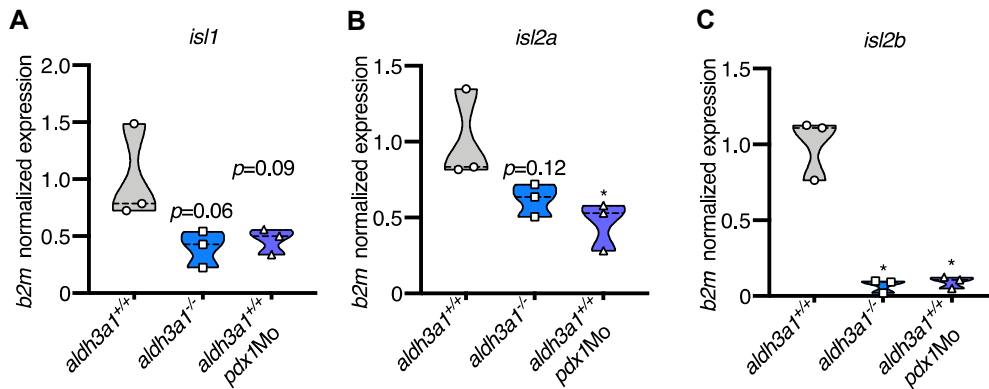

**Figure S3. Aldh3a1 knockout larvae exhibited decreased insulin-related gene expression.**

(A-C). Similar to *pdx1* morpholino mediated silencing, pancreas development-related genes, *isl1* (A) and *isl2a* (B) mRNA showed decreased trends while *isl2b* (C) mRNA reduced strongly in *aldh3a1*<sup>-/-</sup> larvae compared to *aldh3a1*<sup>+/+</sup> larvae at 48 hpf. 6 ng of morpholino: SB-*pdx1*-Mo was injected into the one-cell stage of zebrafish embryos. Expression of mRNA was analysed by RT-qPCR and expression was normalized to *b2m*. The average values of *aldh3a1*<sup>+/+</sup> larvae were standardized to 1, n = 3 clutches with 30 larvae per group. For statistical analysis one-way ANOVA followed by Sidak's multiple comparison test was applied, \* $p < 0.05$ . *b2m*,  $\beta 2$  microglobulin; *isl1*, ISL LIM homeobox 1; *isl2a*, ISL LIM homeobox 2a; *isl2b*, ISL LIM homeobox 2b; NS, not significant; Mo, morpholino.

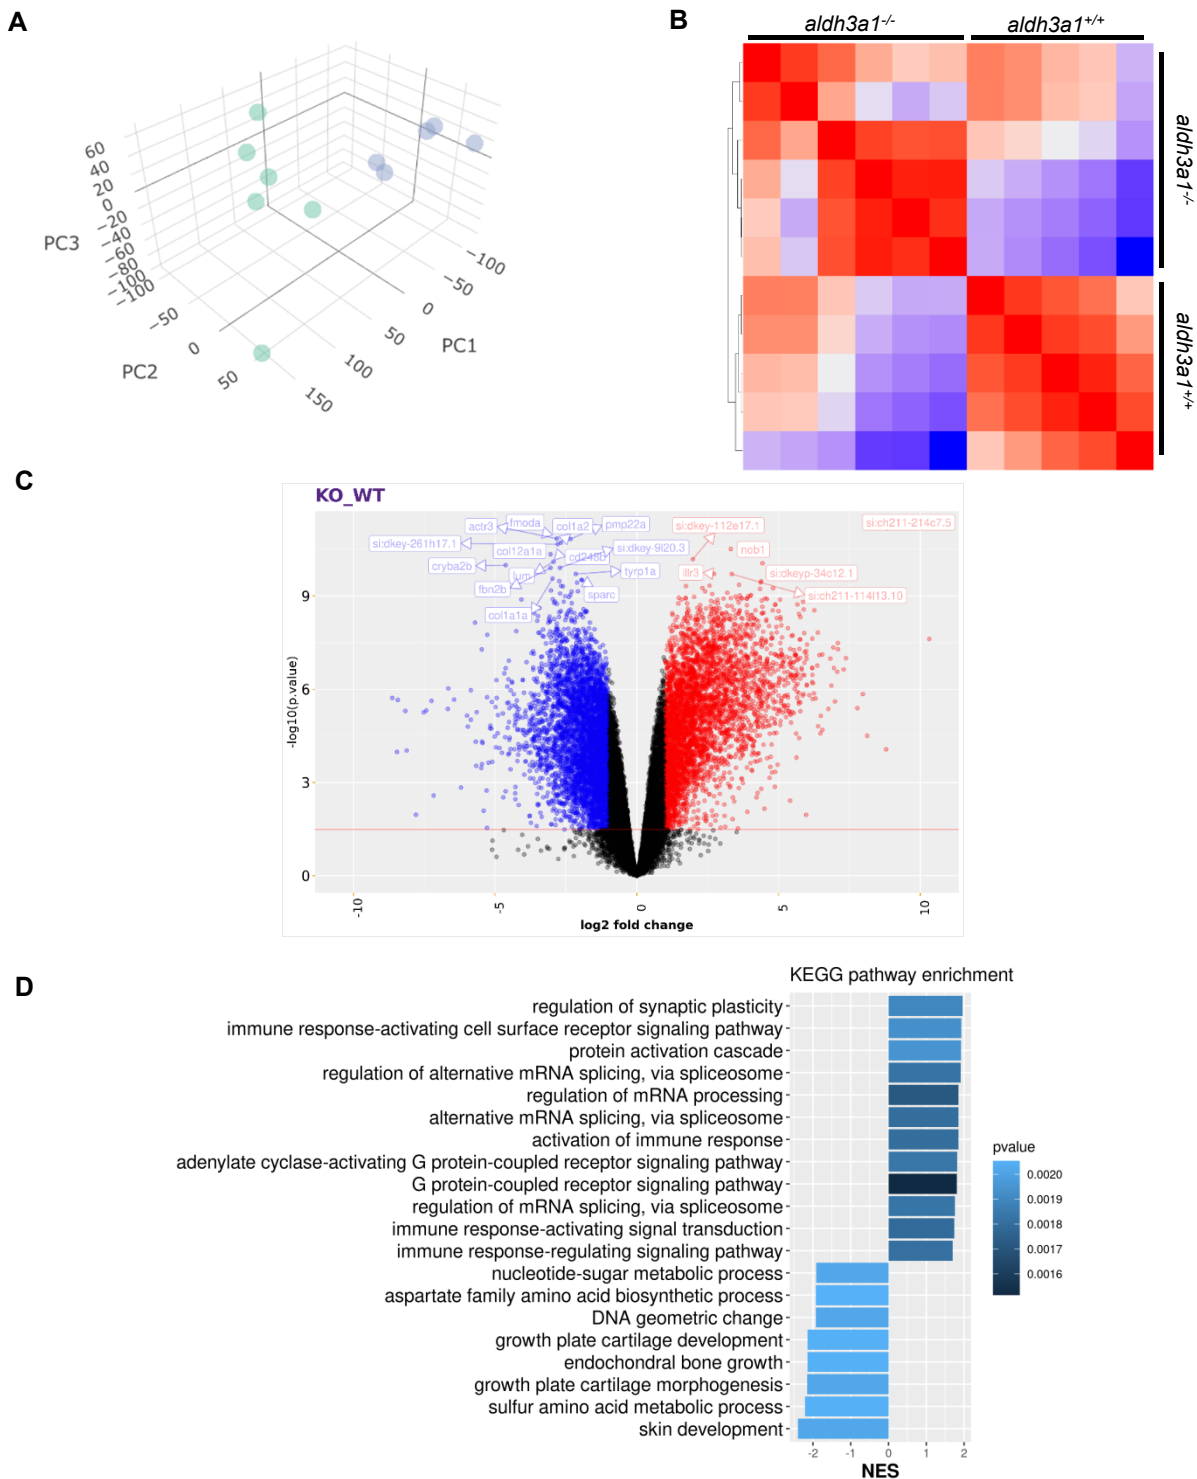

**Figure S4. An overview of RNA Sequencing Results.**

(A). Results of the quality control in gene expression analysis between *aldh3a1*<sup>-/-</sup> and *aldh3a1*<sup>+/+</sup> zebrafish larvae at 48 hpf. Principal component 1,2 and 3 are on the axis. The plots showed the *aldh3a1*<sup>-/-</sup> (n = 6) in green and *aldh3a1*<sup>+/+</sup> (n = 5) in blue. (B). Heatmaps of each samples showed comparable property between *aldh3a1*<sup>-/-</sup> and *aldh3a1*<sup>+/+</sup> zebrafish larvae. (C). Volcano plot showed significant down-regulated (blue dots) and up-regulated (red dots) genes between *aldh3a1*<sup>-/-</sup> and *aldh3a1*<sup>+/+</sup> zebrafish larvae. (D). Top 20 KEGG pathway enrichment of RNA Sequencing results between *aldh3a1*<sup>-/-</sup> and *aldh3a1*<sup>+/+</sup> zebrafish larvae.

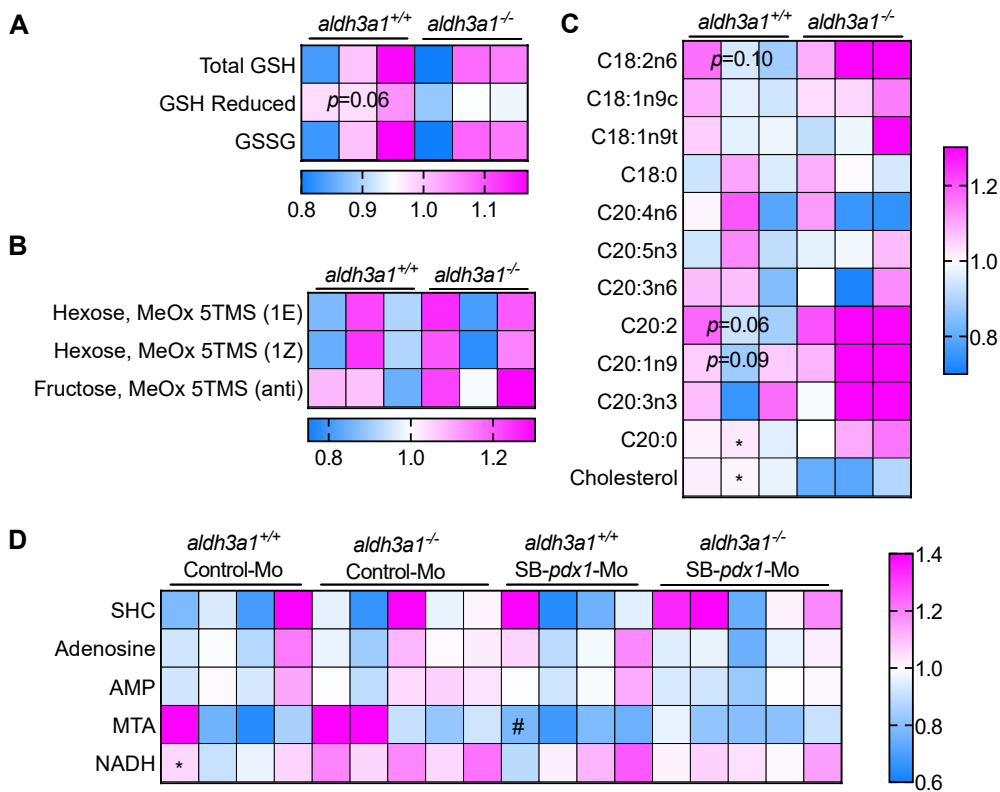

**Figure S5. Metabolomic screening displayed several alternations between *aldh3a1*<sup>-/-</sup> and *aldh3a1*<sup>+/+</sup> *Tg(fli1:EGFP)* zebrafish larvae at 96 hpf.**

(A-C). Heatmap showed the metabolomic screening of thiols (A), sugar level (B) and fatty acids (C) between *aldh3a1*<sup>-/-</sup> and *aldh3a1*<sup>+/+</sup> zebrafish larvae at 96 hpf: (A). GSH reduced showed decreased sign in *aldh3a1* mutants; (B). No changes in sugar level; (C). C20:0 was increased while cholesterol was decreased in *aldh3a1* mutants; n = 3 clutches with 50 larvae, for statistical analysis Student's t-test was applied; \*p<0.05, \*\*p<0.01, \*\*\*p<0.001 (D). Heatmap showed adenosines among each group of zebrafish larvae at 96 hpf. \*: NADH was increased significantly in *aldh3a1*<sup>-/-</sup> zebrafish larvae compared to *aldh3a1*<sup>+/+</sup> larvae with control morpholino injection. #: MTA was decreased significantly in *aldh3a1*<sup>-/-</sup> zebrafish larvae compared to *aldh3a1*<sup>+/+</sup> larvae with *pdx1* morpholino injection. 6 ng of each morpholino was injected into the one-cell stage of zebrafish embryos respectively. n = 4 to 5 clutches with 50 larvae, for statistical analysis one-way ANOVA followed by Sidak's multiple comparison test was applied. In heatmap, the average values of *aldh3a1*<sup>+/+</sup> larvae/ *aldh3a1*<sup>+/+</sup> larvae with control morpholino injection were standardized to 1.

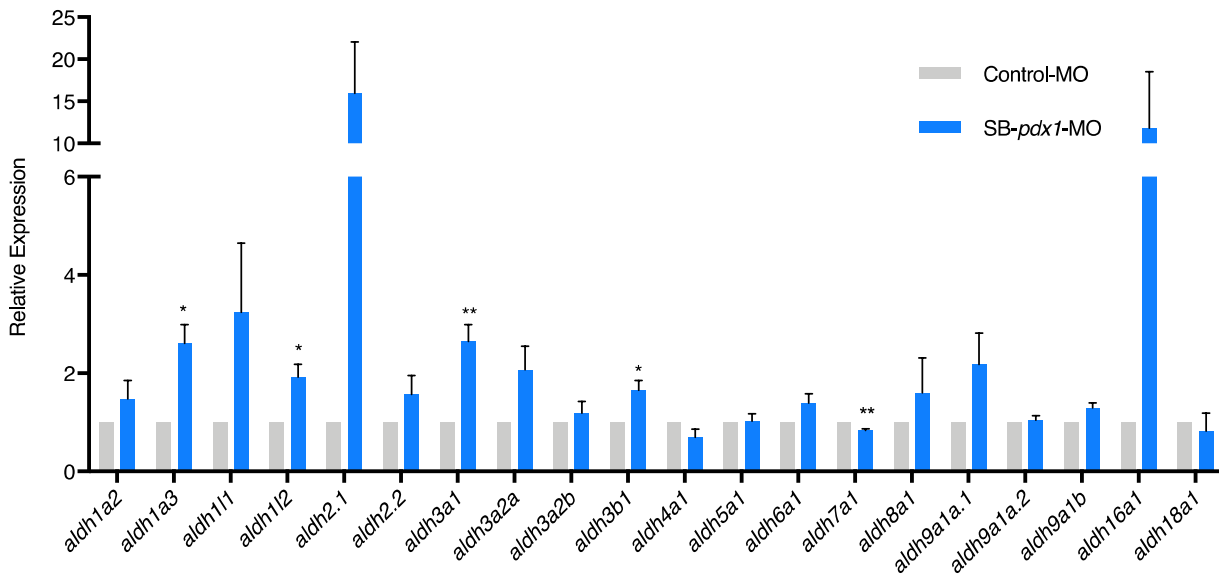

**Figure S6. Aldh mRNA levels in hyperglycaemic zebrafish larvae.**

*Aldh1a3*, *aldh112*, *aldh3a1* *aldh3b1* mRNA levels were raised and *aldh7a1* was decreased significantly in zebrafish larvae at 48 hpf after *pdx1* morpholino injection. 6 ng of morpholinos: Control-Mo and SB-*pdx1*-Mo were injected into the one-cell stage of zebrafish embryos, respectively. Expression of mRNA was analyzed by RT-qPCR at 48 hpf and expression was normalized to beta-actin. Values for Control-Mo injected zebrafish larvae were standardized to 1; n = 3 clutches with 30 larvae per group; Mean  $\pm$  SEM, for statistical analysis Student's t-test was applied, \* $p < 0.05$ , \*\* $p < 0.01$ .

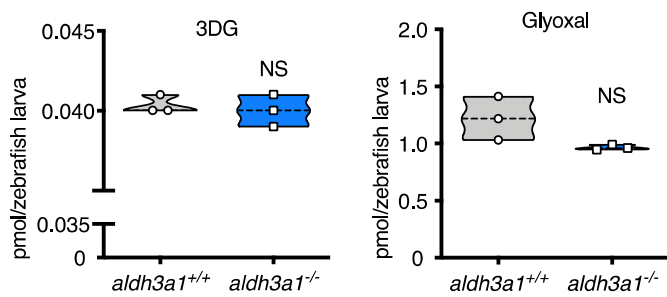

**Figure S7. 3DG and glyoxal were unchanged at 96 hpf.**

N = 3 clutches with around 50 larvae per group. For statistical analysis paired samples t-tests were applied.

NS, not significant.



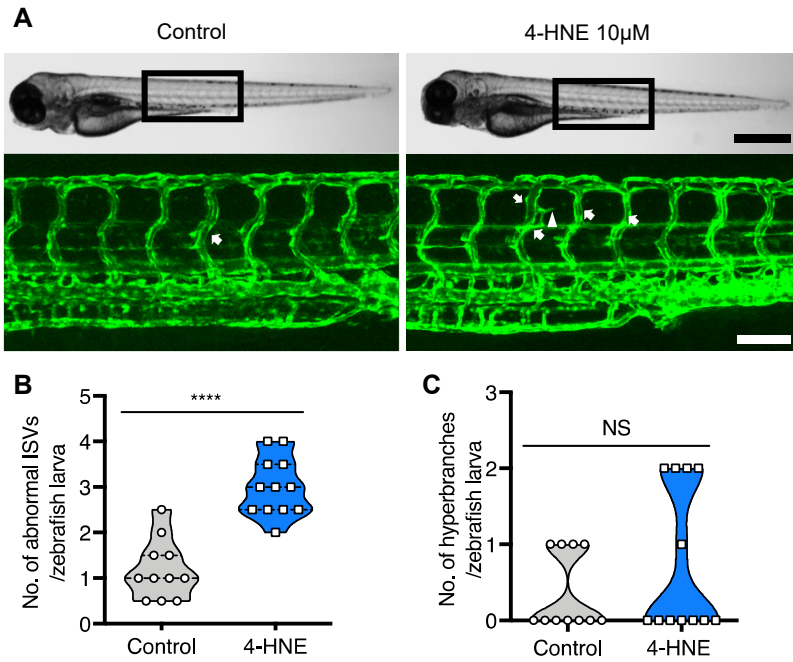

**Figure S8. Exogenous 4-HNE partially altered trunk vasculature morphology in *Tg(fli1:EGFP)* zebrafish larvae.**

Exogenous 4-HNE partially altered trunk vasculature morphology, leading to increased formation of abnormal ISVs (white arrows) in *Tg(fli1:EGFP)* zebrafish larvae at 96 hpf. 10  $\mu$ M 4-HNE treatment were started at 3 hpf and continued until 96 hpf; Medium was changed every day. (A). Light microscopic images showed the gross morphology of zebrafish larvae and black boxes indicate region seen in the confocal images. White scale bar = 100  $\mu$ m, black scale bar =500  $\mu$ m. (B-C). Quantification of abnormal ISV and hyper branches formation in violin plots, n = 11-12 per group, for statistical analysis one-way ANOVA followed by Sidak's multiple comparison test was applied, \*\*\*\*p<0.0001. NS, not significant.

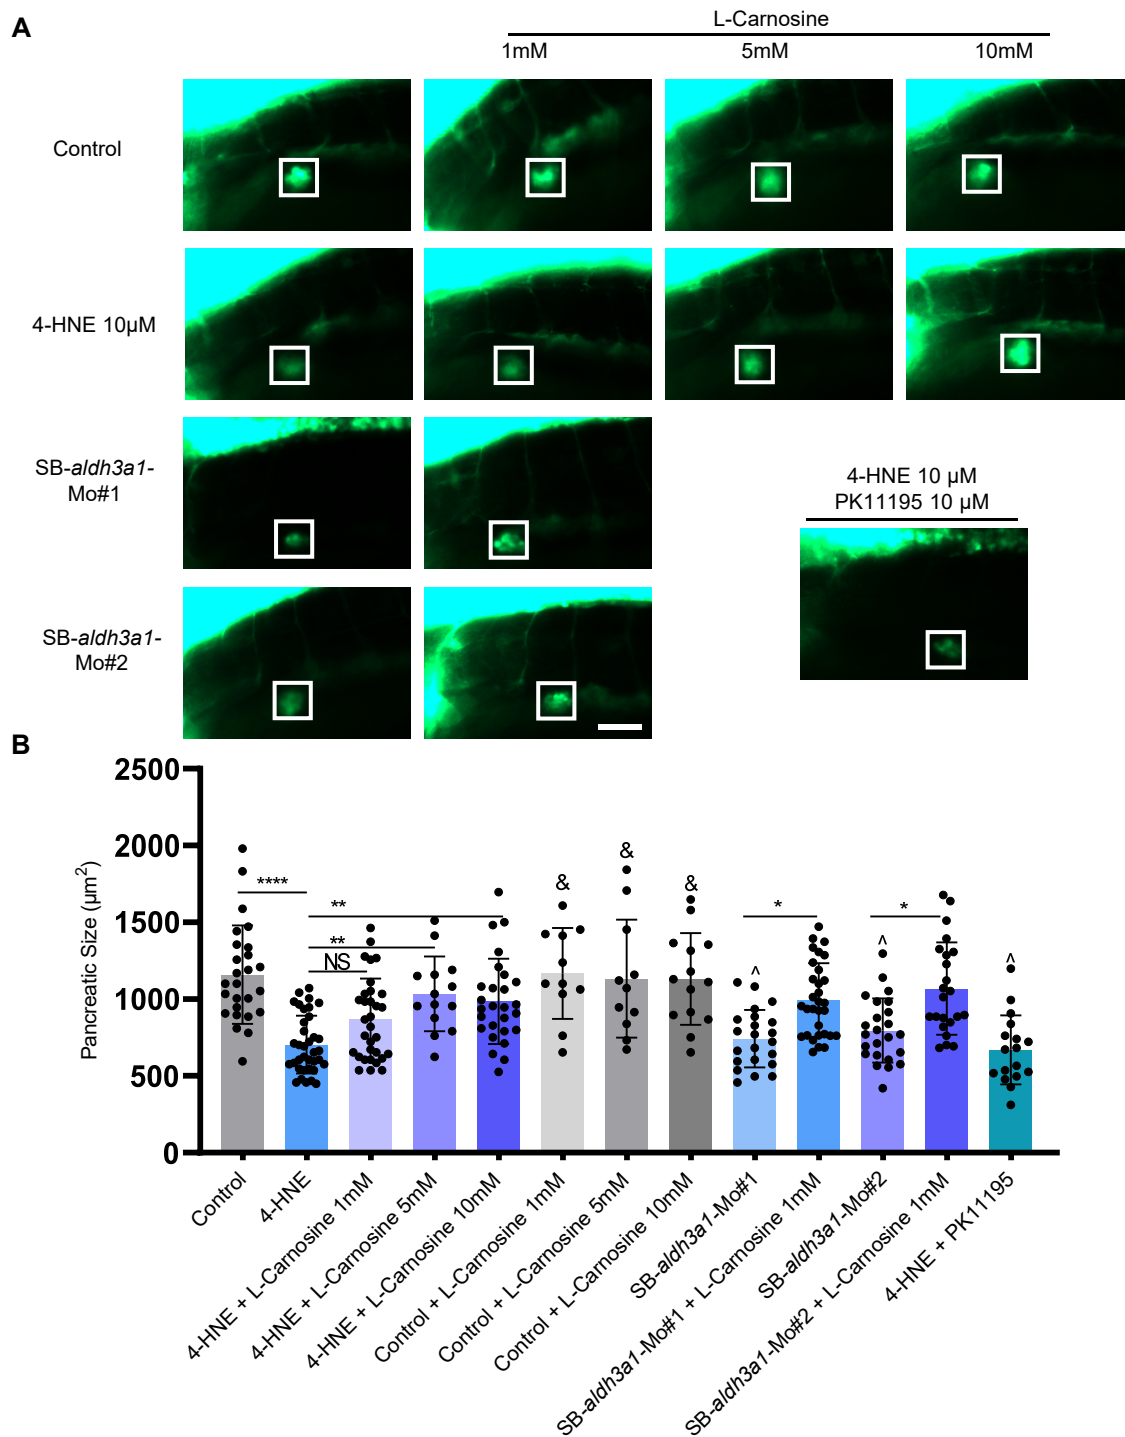

**Figure S9. L-Carnosine can rescue the pancreas disruption caused by both *aldh3a1* silencing and 4-HNE incubation dose-dependently in *Tg(hb9:GFP)* zebrafish larvae.**

(A). 1mM L-Carnosine can rescue the pancreas disruption caused by both *aldh3a1* silencing morpholinos injection in *Tg(hb9:GFP)* zebrafish larvae at 72 hpf. But 1mM L-Carnosine just showed rescued trend in 10µM 4-HNE incubation caused pancreas disruption, and 5mM and 10mM can restore the pancreas morphology significantly. 10 µM PK11195 can not rescue the pancreas disruption caused by 4-HNE treatment. White box indicates the primary pancreas; White scale bar = 50 µm. (B). Quantification of area size of the early pancreas, n = 11-36 per group. For statistical analysis one-way ANOVA followed by Sidak's multiple comparison test was applied, \*p<0.05, \*\*p<0.01, \*\*\*\*p<0.0001. &, p> 0.05 compared to Control group. ^, p<0,0001 compared to Control group. NS, not significant.

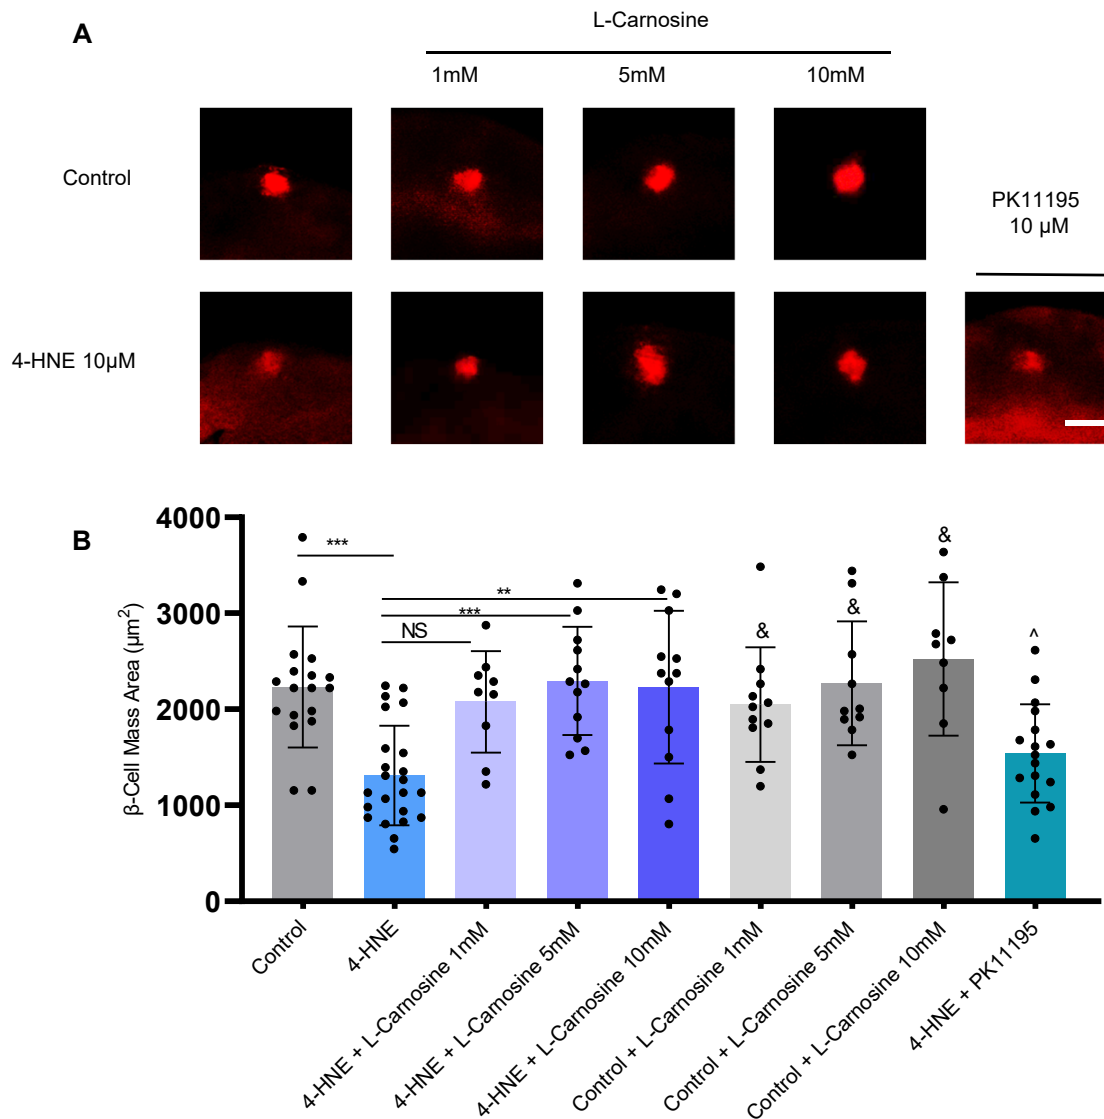

**Figure S10. L-Carnosine can rescue the pancreas disruption caused by 4-HNE incubation dose-dependently in *Tg(ins:nfsB-mCherry)* zebrafish larvae.**

(A). 1mM L-Carnosine showed rescued trend in pancreas disruption caused by 10 $\mu$ M 4-HNE incubation in *Tg(ins:nfsB-mCherry)* larvae; and 5mM and 10mM can restore the pancreas morphology significantly. 10  $\mu$ M PK11195 can not rescue the pancreas disruption caused by 4-HNE treatment. White scale bar = 50  $\mu$ m. (B). Quantification of area size of the early pancreas, n = 9-17 per group. For statistical analysis one-way ANOVA followed by Sidak's multiple comparison test was applied, \*\*p<0.01, \*\*\*p<0.0001. &, p> 0.05 compared to Control group. ^, p=0.039 compared to Control group. NS, not significant.

| <b>Time/Concentration</b> | <b>0<math>\mu</math>M</b> | <b>5<math>\mu</math>M</b> | <b>10<math>\mu</math>M</b> | <b>25<math>\mu</math>M</b> |
|---------------------------|---------------------------|---------------------------|----------------------------|----------------------------|
| 24hpf                     | 30                        | 30                        | 30                         | 30                         |
| 48hpf                     | 29                        | 27                        | 26                         | 29                         |
| 72hpf                     | 27                        | 24                        | 24                         | 24                         |
| 96hpf                     | 27(1edema)                | 24(3edema)                | 24(6edema)                 | 20(12edema)                |

**Table S1. Survival condition of 4-HNE incubation in zebrafish larvae from 24 hpf to 96 hpf.**

| Group         | Age    | Sex    | BMI   | HbA1c(%) | Fasting Glucose (mg/ml) | LDL (mg/dl) | TG (mg/dl) | 4-HNE (ng/ml) |
|---------------|--------|--------|-------|----------|-------------------------|-------------|------------|---------------|
| Control       | 48     | male   | 26.8  | 5.4      | 90                      | 214         | 111        | 17.98         |
|               | 70     | female | 24.9  | 5.5      | 96                      | 149         | 66         | 7.28          |
|               | 66     | female | 19.3  | 5.3      | 92                      | 138         | 107        | 21.30         |
|               | 59     | female | 29.3  | 5.1      | 89                      | 153         | 102        | 21.70         |
|               | 63     | male   | 34.7  | 6.0      | 98                      | 140         | 182        | 15.86         |
|               | 45     | female | 23.6  | 5.3      | 87                      | 116         | 76         | 12.84         |
|               | 58     | male   | 25.4  | 5.2      | 96                      | 202         | 112        | 9.38          |
|               | 40     | female | 24.3  | 5.3      | 91                      | 81          | 37         | 20.64         |
|               | 60     | male   | 24.8  | 5.9      | 95                      | 116         | 96         | 11.22         |
| Mean(Control) | 56.1   |        | 25.9  | 5.4      | 92.7                    | 149.1       | 98.8       | 15.36         |
| T2DM          | 65     | female | 30.5  | 7.4      | 195                     | 96          | 189        | 31.78         |
|               | 56     | female | 28.0  | 8.9      | 148                     | 78          | 126        | 36.08         |
|               | 68     | male   | 24.6  | 7.3      | 147                     | 108         | 108        | 25.48         |
|               | 46     | male   | 31.1  | 7.3      | 181                     | 131         | 245        | 17.90         |
|               | 64     | female | 23.3  | 6.5      | 136                     | 157         | 105        | 12.10         |
|               | 76     | male   | 24.0  | 7.8      | 205                     | 38          | 64         | 25.40         |
|               | 64     | female | 28.4  | 9.9      | 225                     | 173         | 181        | 36.90         |
|               | 63     | male   | 25.7  | 7.4      | 155                     | 127         | 115        | 9.98          |
|               | 54     | male   | 31.0  | 7.7      | 148                     | 115         | 116        | 18.34         |
|               | 63     | male   | 31.8  | 5.6      | 130                     | 98          | 85         | 22.18         |
| 49            | female | 28.1   | 5.8   | 115      | 126                     | 112         | 18.98      |               |
| Mean(T2DM)    | 60.7   |        | 27.9  | 7.4      | 162.3                   | 113.4       | 131.5      | 23.19         |
| <i>p</i>      | 0.333  | 0.673  | 0.247 | <0.001   | <0.001                  | 0.085       | 0.142      | 0.0322        |

**Table S2. Baseline characteristics of the control and T2DM patient cohorts. All parameters (4-HNE excluded) were determined prior to collection.**

| <b>Morpholinos</b>                                             | <b>Sequence</b>                 |
|----------------------------------------------------------------|---------------------------------|
| SB- <i>aldh3a1</i> -Mo#1<br>(targets intron3 – exon4 junction) | 5'-GCCGCATTTCTAATCAACAAGAGG-3'  |
| SB- <i>aldh3a1</i> -Mo#2<br>(targets exon4 – intron4 junction) | 5'-AACAAATCTATGCACCTTATCCAGA-3' |
| SB- <i>pdx1</i> -Mo<br>(targets translation start site)        | 5'-GATAGTAATGCTCTTCCCGATTCAT-3' |
| Control-Mo                                                     | 5'-CCTCTTACCTCAGTTACAATTTATA-3' |

  

| <b>Genotyping primer name</b>     | <b>Primer sequence (5' to 3')</b> |
|-----------------------------------|-----------------------------------|
| <i>Aldh3a1</i> Mo-Genotyping-1.1* | AGGTGGCAGAGCGTGAGATG              |
| <i>Aldh3a1</i> Mo-Genotyping-1.2* | GAACCCCTCCTGTCACCACC              |

\*These primer pair can be used for both *aldh3a1* morpholinos as the PCR product spans both target sites.

**Table S3. Morpholinos and the genotyping primers for zebrafish *aldh3a1* morpholinos.**

| <b>CRISPR-construct name</b>   | <b>Oligonucleotide sequence (5' to 3')</b> |
|--------------------------------|--------------------------------------------|
| <i>Aldh3a1</i> -CRISPR-for     | TAGGGGTCTGGATCTGCCTGAC                     |
| <i>Aldh3a1</i> -CRISPR-rev     | AAACGTCAGGCAGATCCAGACC                     |
|                                |                                            |
| <b>Genotyping primer name</b>  | <b>Primer sequence (5' to 3')</b>          |
| <i>Aldh3a1</i> -Genotyping#1.1 | ACATGGACTGAACAGTGACCTTGG                   |
| <i>Aldh3a1</i> -Genotyping#1.2 | CTCACGCTCTGCCACCTTGAT                      |
| <i>Aldh3a1</i> -Genotyping#1.3 | CTCTTTGTGAAATCCTAAACCCT                    |
| <i>Aldh3a1</i> -Genotyping#1.4 | TGTCTGCATGGCGTTCAGTGA                      |

**Table S4. CRISPR construct and genotyping primers for zebrafish *aldh3a1*.**

| qPCR primer name  | Primer sequence            | qPCR primer name    | Primer sequence         |
|-------------------|----------------------------|---------------------|-------------------------|
| β-actin-qPCR-for  | ACGGTCAGGTCATCACCATC       | aldh6a1-qPCR-rev    | TCTTTGGCCTGAGGTGAGAT    |
| β-actin-qPCR-rev  | TGGATACCGCAAGATTCCAT       | aldh7a1-qPCR-for    | AACCGCAGCACCGAATATGT    |
| b2m-qPCR-for      | ACTGCTGAAGAACGGACAGG       | aldh7a1-qPCR-rev    | TCTGCTATGGTTGCCTGACG    |
| b2m-qPCR-rev      | GCAACGCTCTTTGTGAGGTG       | aldh8a1-qPCR-for    | CTCCAGCTTCTCCAATCAGG    |
| aldh1a2-qPCR-for  | AACCACTGAACACGGACCTC       | aldh8a1-qPCR-rev    | GTAAACGCTCCGCTCCAC      |
| aldh1a2-qPCR-rev  | ATGAGCTCCAGCACACGTC        | aldh9a1a.1-qPCR-for | GCTCTGTTCGAAATCTGTGTTCC |
| aldh1a3-qPCR-for  | CGTGTTTGCAAGACTCAGACC      | aldh9a1a.1-qPCR-rev | CGACCAGTTGCTGGCTCGTA    |
| aldh1a3-qPCR-rev  | TGAAGAAAGCCCCCTTCTG        | aldh9a1a.2-qPCR-for | TCCCATGGTGGCTAAAGTGT    |
| aldh1l1-qPCR-for  | GCTGCCAGACACAGAGG          | aldh9a1a.2-qPCR-rev | TAGCTGCCATTTCCAAAACC    |
| aldh1l1-qPCR-rev  | AACCCTCCCTTCTTATACCA       | aldh9a1b-qPCR-for   | GGAGCAAGCCAAGAACGA      |
| aldh1l2-qPCR-for  | AGCCGCTTCAATGGATGTAG       | aldh9a1b-qPCR-rev   | GGATCTGCAGGGCTGAAA      |
| aldh1l2-qPCR-rev  | GAACACCAGCGCATTTCTG        | aldh16a1-qPCR-for   | CCACAGGGTGTGTGACGGT     |
| aldh2.1-qPCR-for  | CGCACTGTATATCGCCAGTTTA     | aldh16a1-qPCR-rev   | AGGAGGCCAGGAAGAGCAGT    |
| aldh2.1-qPCR-rev  | GGACCAAACCCTGGGATAAT       | aldh18a1-qPCR-for   | GCACAGGAAGCCCTGTCTAT    |
| aldh2.2-qPCR-for  | TGCAGTCTCCTTCAGTGTGG       | aldh18a1-qPCR-rev   | CTCTTCACGAGTGCTACCA     |
| aldh2.2-qPCR-rev  | TGCCAGCCAGCATAATAC         | glo1-qPCR-for       | AGCAGACAATGCTGCGGGTG    |
| aldh3a1-qPCR-for  | CACTGTTGATACTTTACCTTTTGGAG | glo1-qPCR-rev       | CTACGGGAGAACGTCCAGGC    |
| aldh3a1-qPCR-rev  | CAAACGTGTGTTTCCCATGA       | ins-qPCR-for        | GGTCGTGTCCAGTGAAGCA     |
| aldh3a2a-qPCR-for | TGATGAATCTGAGTGTACATTGC    | ins-qPCR-rev        | GGAAGGAAACCCAGAAGGGG    |
| aldh3a2a-qPCR-rev | TGGCCCAAAGATCTCTTCC        | insb-qPCR-for       | CCTGGAGACCTTGCTGGCTTTG  |
| aldh3a2b-qPCR-for | CACTTCTCTGTCAGCTCTCTGC     | insb-qPCR-rev       | CCAGGTGGTAGATGGTGCAGG   |
| aldh3a2b-qPCR-rev | GATAGCGGCCATAACCACT        | isl1-qPCR-for       | AGGGTATGGCAGCCGAGGTC    |
| aldh3b1-qPCR-for  | CATGACTCTTCTGGTTTACCC      | isl1-qPCR-rev       | GCTTGCATGCTTAGTACTTGGGC |
| aldh3b1-qPCR-rev  | TGATAGTTGCCATCCCACT        | isl2a-qPCR-for      | CATCCCAGAACCTGTGCCAGT   |
| aldh4a1-qPCR-for  | TGGACCAAAGACATCCGATT       | isl2a-qPCR-rev      | ACTCGTATGACCCGTGGGCT    |
| aldh4a1-qPCR-rev  | AGCAGAACTTTGCAACTTGGT      | isl2b-qPCR-for      | GCTGGGAGCGGGATACAAGG    |
| aldh5a1-qPCR-for  | GGGCCTTATCAACTCACG         | isl2b-qPCR-rev      | TCCGGACTTCTTTTGAATGATCC |
| aldh5a1-qPCR-rev  | TCCATGATCCACAGCGTCT        | pdx1-qPCR-for       | ACACGCACGCATGGAAGGACA   |
| aldh6a1-qPCR-for  | GTCTACGTGTCAATGCAGGTG      | pdx1-qPCR-rev       | GCGGGCGCGAGATGTATTTGTT  |

**Table S5. qPCR primers.**
